# Supplementary material
Source: ML conference proceedings conference paper supplement (https://proceedings.neurips.cc/paper_files/paper/2009/hash/9246444d94f081e3549803b928260f56-Abstract.html)
Supplement: Supplementary file 1 [file 9246444d94f081e3549803b928260f56-Supplemental.zip]

---

# A Fast, Consistent Kernel Two-Sample Test: Appendix

---

**Arthur Gretton**  
Carnegie Mellon University  
MPI for Biological Cybernetics  
*arthur.gretton@gmail.com*

**Kenji Fukumizu**  
Inst. of Statistical Mathematics  
Tokyo Japan  
*fukumizu@ism.ac.jp*

**Zaid Harchaoui**  
Carnegie Mellon University  
Pittsburgh, PA, USA  
*zaid.harchaoui@gmail.com*

**Bharath K. Sriperumbudur**  
Dept. of ECE, UCSD  
La Jolla, CA 92037  
*bharathsv@ucsd.edu*

## 1 Proof of convergence of covariance operator trace

We begin with a number of standard definitions and results, taken from [1]. We recall first the definition of the covariance operator for a distribution  $P$  on  $\mathcal{X}$  from equation (4) in the main document. This can be written

$$C := \tilde{C} - M,$$

where  $\tilde{C} := \mathbf{E}(\phi(x) \otimes \phi(x))$  is the uncentered covariance operator,  $M := \mu \otimes \mu$ , and we have defined  $f \otimes g : \mathcal{H} \rightarrow \mathcal{H}$  such that  $(f \otimes g)h = \langle g, h \rangle_{\mathcal{H}} f$ . Next, given any orthonormal basis  $\psi_i$  for  $\mathcal{H}$ , the trace of  $C$  is

$$\mathrm{tr}(C) := \sum_{p=1}^{\infty} \langle \psi_p, C\psi_p \rangle.$$

In particular,

$$\mathrm{tr}(f \otimes g) = \langle f, g \rangle,$$

from which it follows that  $\mathrm{tr}(C) := E \|\phi(x)\|^2 - \|\mu\|^2$ .

We next describe the empirical covariance operator based on a sample  $(x_1, \dots, x_m)$ , and specify its trace. We write

$$C_m := \tilde{C}_m - M_m,$$

where

$$\tilde{C}_m := \frac{1}{m} \sum_{i=1}^m \phi(x_i) \otimes \phi(x_i)$$

and

$$M_m := \frac{1}{m(m-1)} \sum_{i \neq j}^m \phi(x_i) \otimes \phi(x_j).$$

It follows that

$$\mathrm{tr}(C_m) = \frac{1}{m} \sum_{i=1}^m \|\phi(x_i)\|^2 - \frac{1}{m(m-1)} \sum_{i \neq j}^m \langle \phi(x_i), \phi(x_j) \rangle.$$

Before proceeding to our main result, we recall McDiarmid's theorem [2].

**Theorem 1 (McDiarmid)** Let  $f : \mathcal{X}^m \rightarrow \mathbb{R}$  be a function such that for all  $i \in \{1, \dots, m\}$ , there exist  $c_i < \infty$  for which

$$\sup_{\mathbf{x} \in \mathcal{X}^m, \tilde{x} \in \mathcal{X}} |f(x_1, \dots, x_m) - f(x_1, \dots, x_{i-1}, \tilde{x}, x_{i+1}, \dots, x_m)| \leq c_i.$$

Then for all measures  $P$  on  $\mathcal{X}$  and every  $t > 0$ ,

$$P_{x^m}(f(\mathbf{x}) - \mathbf{E}_{x^m}(f(\mathbf{x})) > t) < \exp\left(-\frac{2t^2}{\sum_{i=1}^m c_i^2}\right).$$

We now proceed to our main result.

**Theorem 2** Assume  $\|\phi(x)\|^2 \leq B$  for all  $x \in \mathcal{X}$ . Then  $|\text{tr}(C) - \text{tr}(C_m)| = o_p(m^{-1/2})$ .

**Proof** First, we decompose

$$|\text{tr}(C) - \text{tr}(C_m)| \leq |\text{tr}(\tilde{C}) - \text{tr}(\tilde{C}_m)| + |\text{tr}(M) - \text{tr}(M_m)|.$$

We consider the first term. Define as  $\tilde{C}'_m$  the empirical covariance operator obtained by replacing the  $i_0$ th sample  $x_{i_0}$  with  $x'_{i_0}$ . Then

$$|\text{tr}\tilde{C}_m - \text{tr}\tilde{C}'_m| = \frac{1}{m} \left| \|\phi(x_{i_0})\|^2 - \|\phi(x'_{i_0})\|^2 \right| \leq \frac{B}{m},$$

and we obtain convergence in probability with rate  $m^{-1/2}$  by McDiarmid's theorem. We next consider the second term. Again replacing a particular  $x_{i_0}$  with  $x'_{i_0}$  and defining the resulting empirical centering operator as  $M'_m$ , we get<sup>1</sup>

$$\begin{aligned} |\text{tr}M_m - \text{tr}M'_m| &\leq \frac{2}{m(m-1)} \left| \sum_{j \neq i_0} \langle \phi(x_{i_0}) - \phi(x'_{i_0}), \phi(x_j) \rangle \right| \\ &\leq \frac{2}{m(m-1)} \sum_{j \neq i_0} \|\phi(x_{i_0}) - \phi(x'_{i_0})\| \|\phi(x_j)\| \\ &\leq \frac{4B}{m}. \end{aligned}$$

We apply McDiarmid's theorem to obtain convergence in probability with rate  $m^{-1/2}$ . ■

## References

- [1] G. Blanchard, O. Bousquet, and L. Zwald. Statistical properties of kernel principal component analysis. *Machine Learning*, 66:259–294, 2007.
- [2] C. McDiarmid. On the method of bounded differences. In *Survey in Combinatorics*, pages 148–188. Cambridge University Press, 1989.

---

<sup>1</sup>Note: the sums  $\sum_{j \neq i_0}$  in the expressions below are taken only over the index  $j$ , and not the fixed index  $i_0$ .

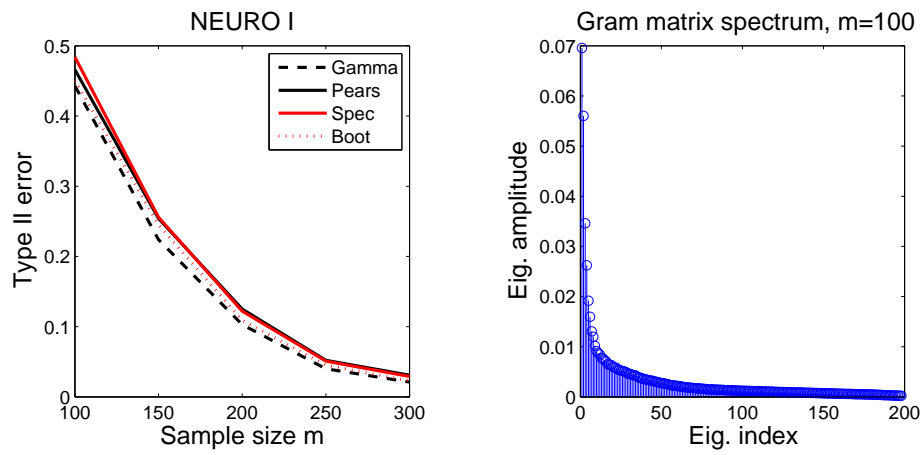

Figure 1: NEURO I dataset. **Left:** Plot of Type II error vs number  $m$  of samples. **Right:** Eigenspectrum of a centered Gram matrix obtained by drawing  $m = 100$  points from each of  $P$  and  $Q$ , where  $P \neq Q$ .
